# Supplementary material for: Efficient photosensitized splitting of the thymine dimer/oxetane unit on its modifying β-cyclodextrin by a binding electron donor
Source: Royal Society of Chemistry journal article supplement (doi:10.1039/b604529d), 2006-01-01

**Supporting Information for**

**Efficient photosensitized splitting of the thymine  
dimer/oxetane unit on its modifying  $\beta$ -cyclodextrin by a  
binding electron donor**

**Wen-Jian Tang, Qin-Hua Song,\* Hong-Bo Wang, Jing-yu Yu, Qing-Xiang Guo**

Department of Chemistry, University of Science and Technology of China, and State Key Laboratory of  
Elemento-Organic Chemistry, Nankai University, Hefei 230026, Anhui, P. R. China. Fax: +86-551-3601592; Tel:  
+86-551-3607524; E-mail: qhsong@ustc.edu.cn

**Table of contents:**

|                                         |    |
|-----------------------------------------|----|
| ● $^1\text{H}$ NMR spectrum of TD-CD    | S2 |
| ● $^{13}\text{C}$ NMR spectrum of TD-CD | S3 |
| ● $^1\text{H}$ NMR spectrum of Ox-CD    | S4 |
| ● $^{13}\text{C}$ NMR spectrum of Ox-CD | S5 |

Figure S1 The <sup>1</sup>H NMR spectrum of TD-CD

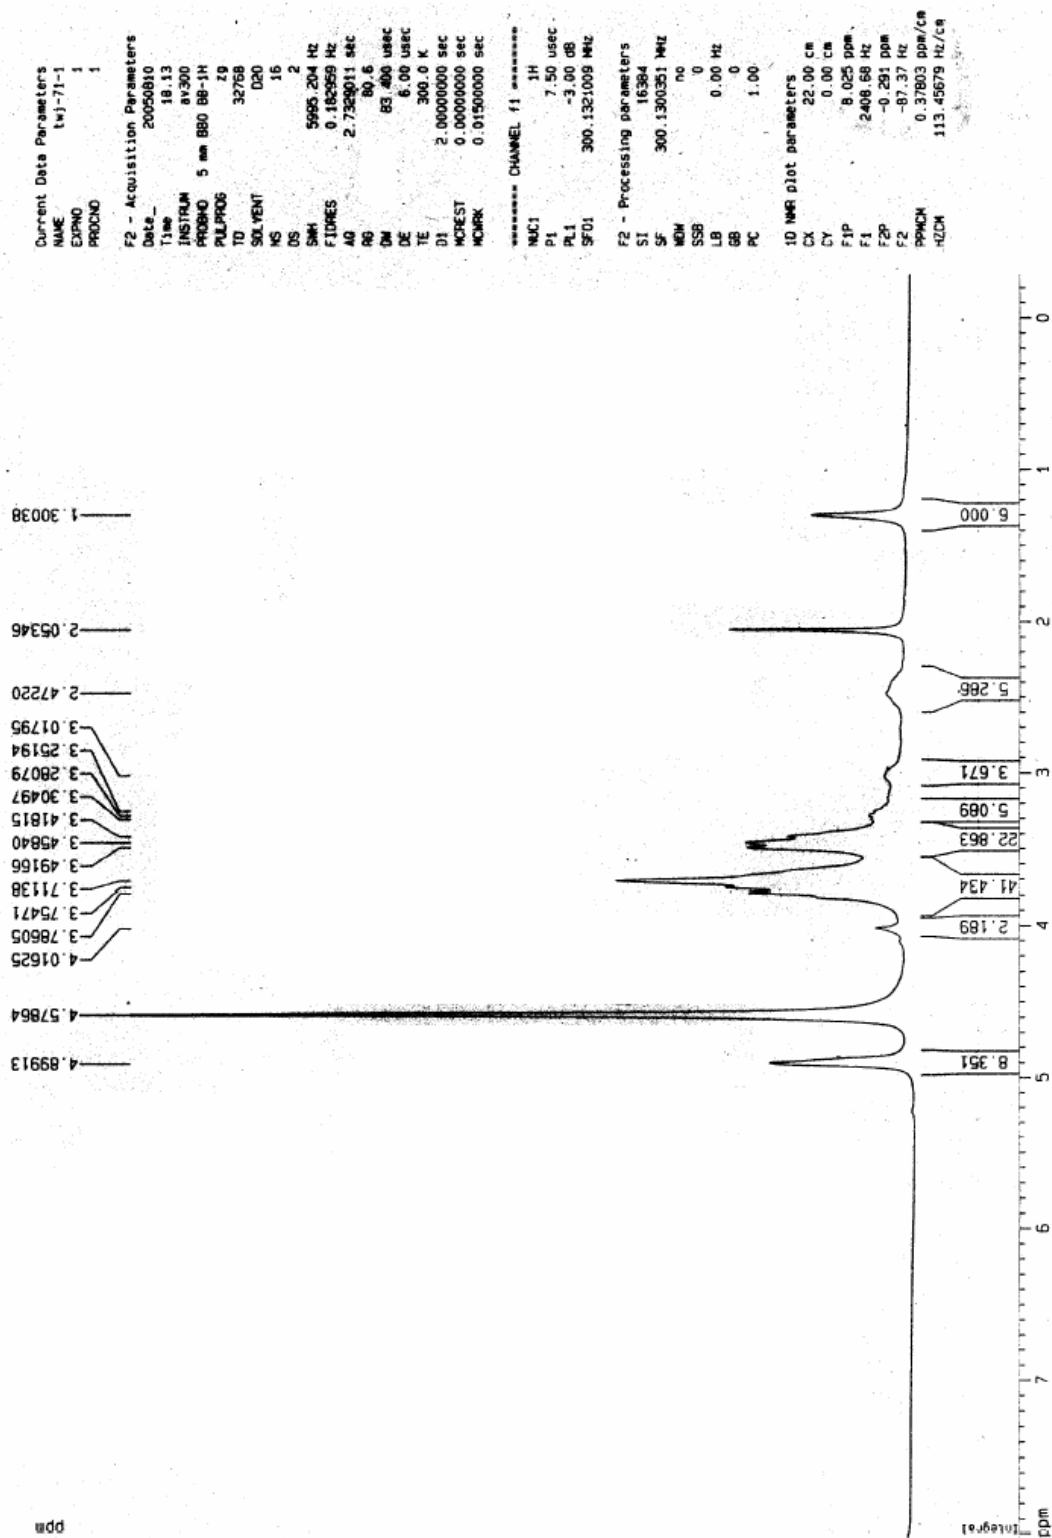

Figure S2 The  $^{13}\text{C}$  NMR spectrum of TD-CD

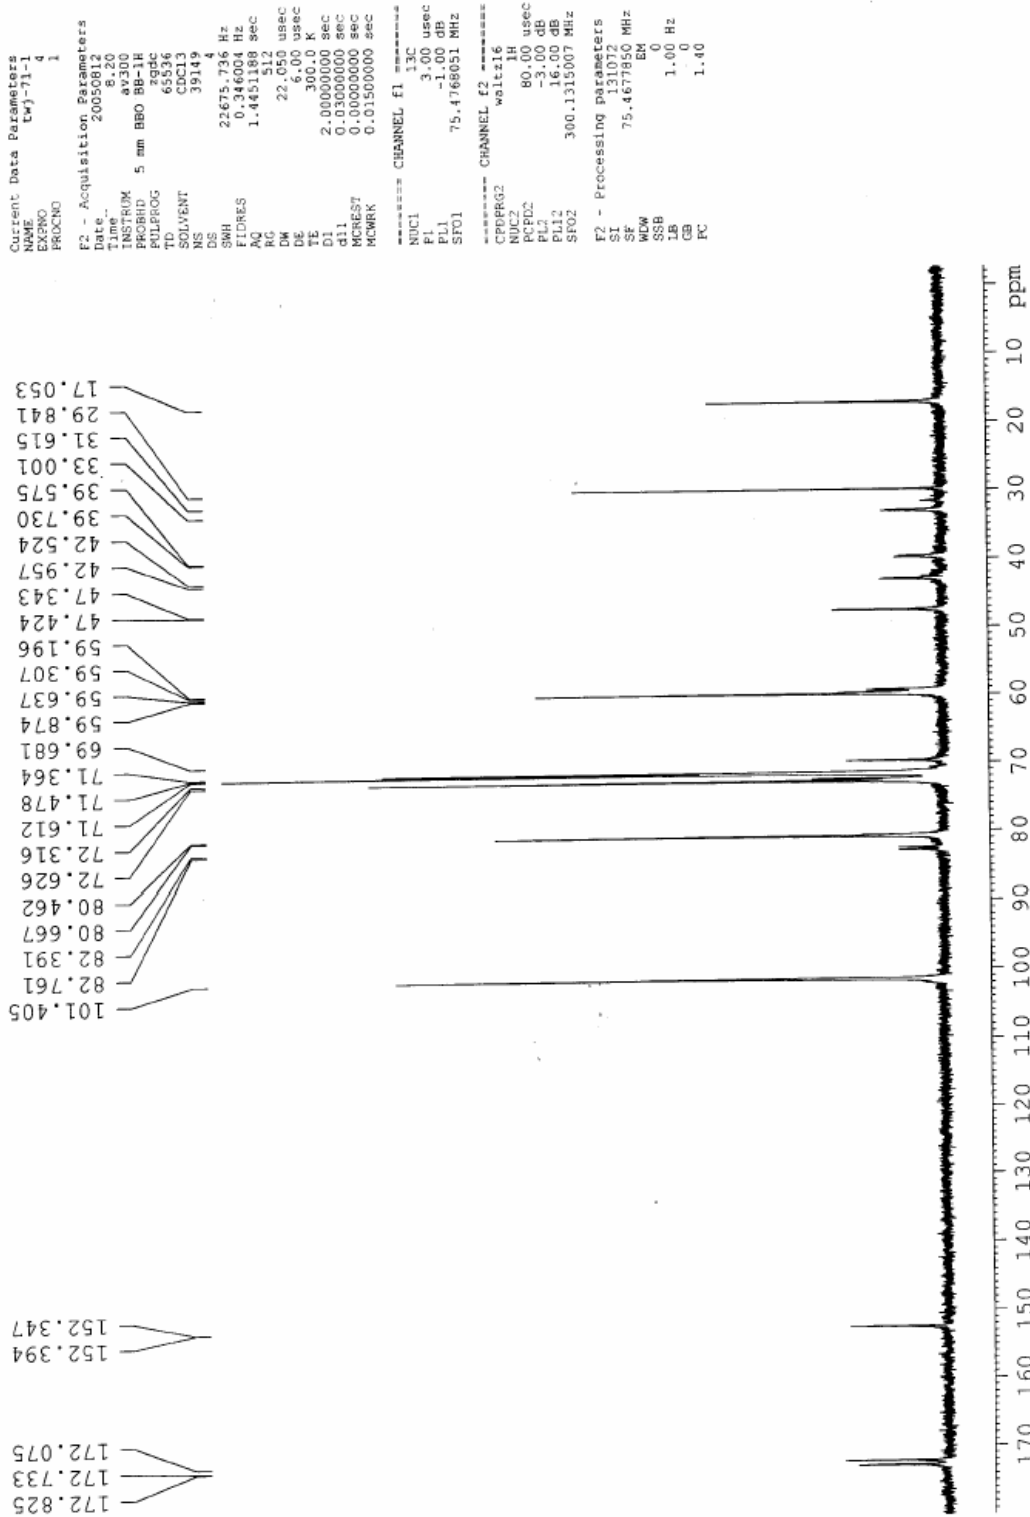

Figure S3 The  $^1\text{H}$  NMR spectrum of Ox-CD

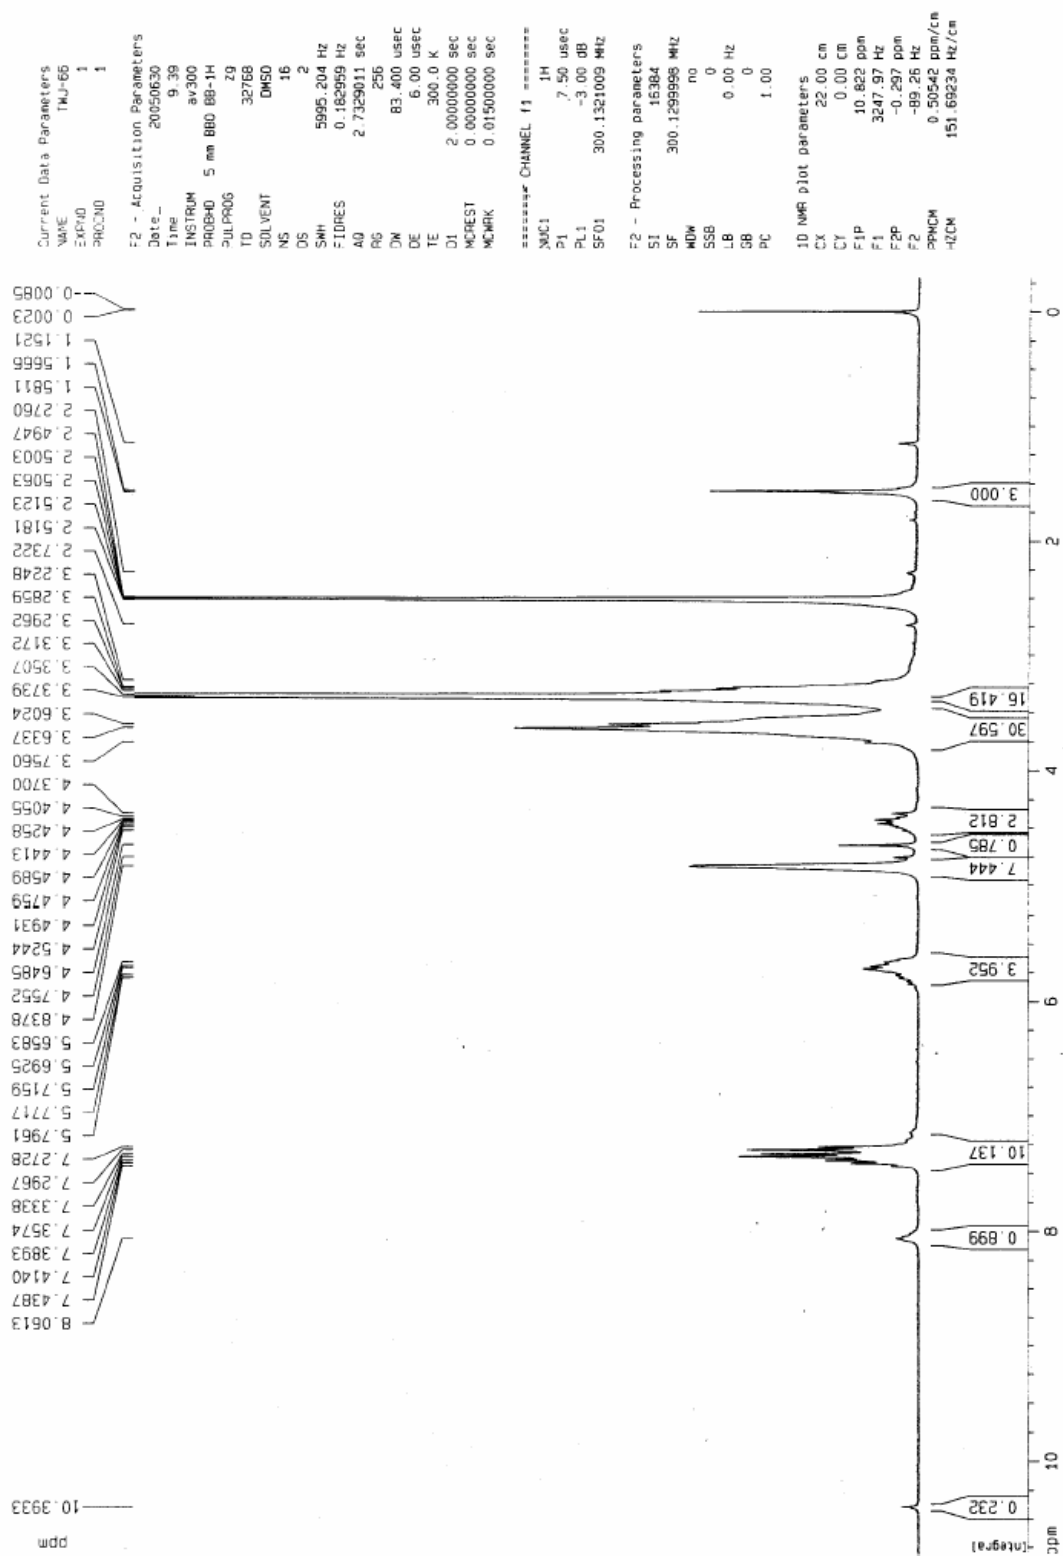

Figure S4 The  $^{13}\text{C}$  NMR spectrum of Ox-CD

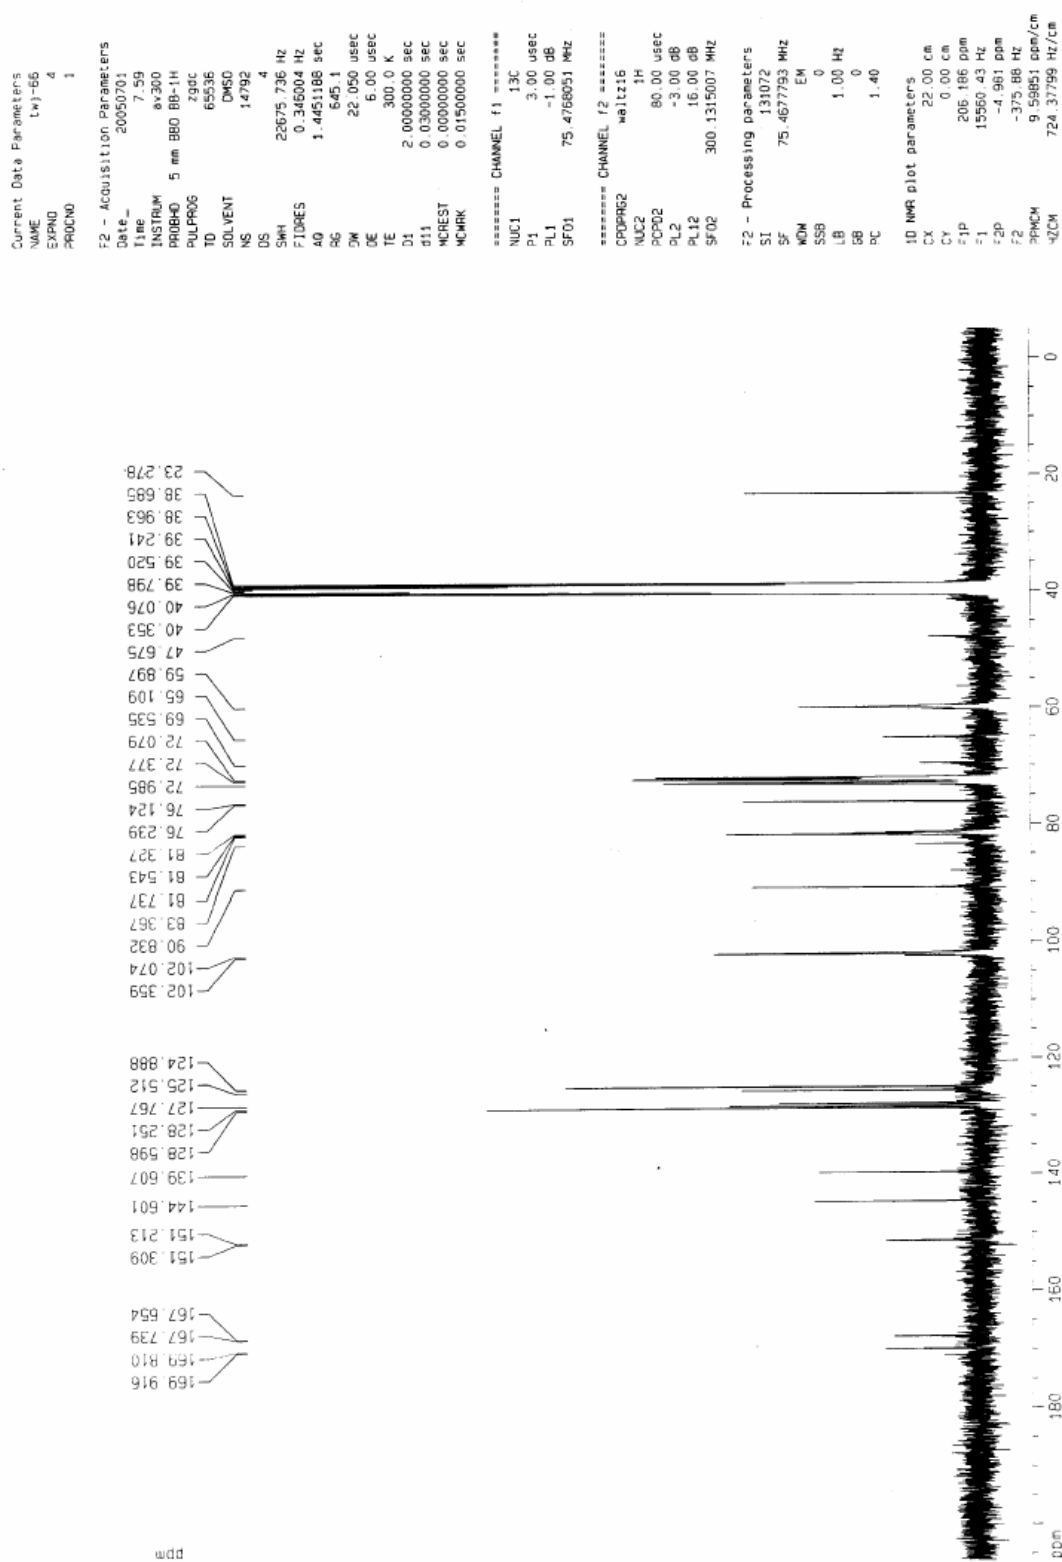

Supplement: b604529d.pdf [file b604529d.pdf]
